# Supplementary material for: Bacterioboat—A novel tool to increase the half-life period of the orally administered drug
Source: PubMed Central journal article supplement — Sci Adv. 2022 Mar 11;8(10):eabh1419. doi: 10.1126/sciadv.abh1419 (PMC8916724; doi:10.1126/sciadv.abh1419), 2022-03-11
Supplement: sciadv.abh1419_sm.pdf [file sciadv.abh1419_sm.pdf]

Supplementary Materials for

**Bacterioboot—A novel tool to increase the half-life period of the orally administered drug**

Parmandeep Kaur, Sandip Ghosh, Arghya Bhowmick, Kundlik Gadhave, Satabdi Datta, Abhrajyoti Ghosh, Neha Garg, Roop L. Mahajan, Biswarup Basu\*, Diptiman Choudhury\*

\*Corresponding author. Email: diptiman@thapar.edu (D.C.); biswarup.basu@gmail.com (B.B.)

Published 11 March 2022, *Sci. Adv.* **8**, eabh1419 (2022)  
DOI: 10.1126/sciadv.abh1419

**This PDF file includes:**

Figs. S1 to S5  
Tables S1 to S22

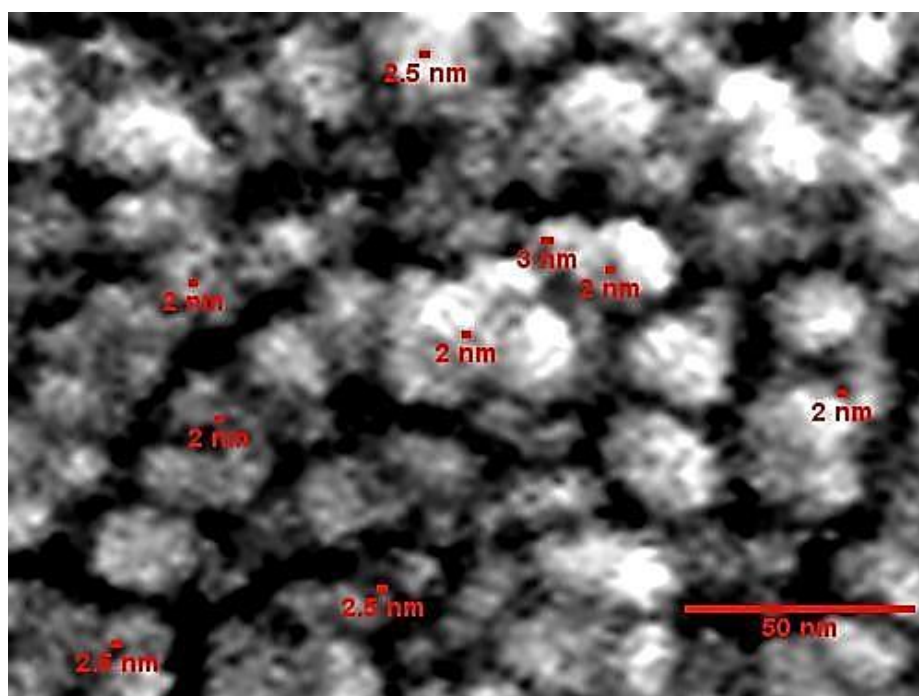

fig. S-1 FESEM image showing porous Bacterioblast surface with pore diameter 2-3 nm.

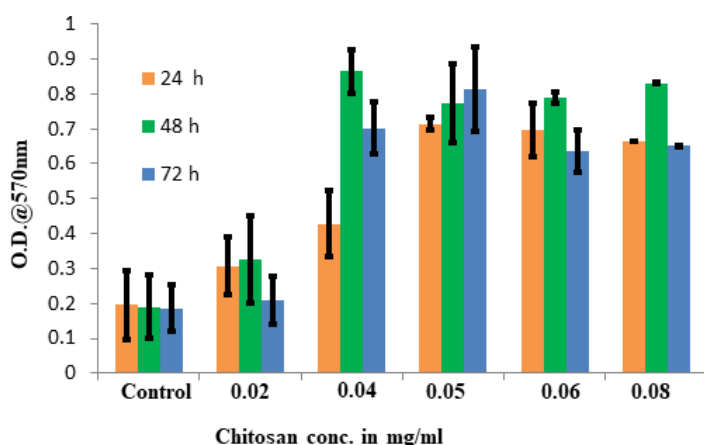

**fig. S-2 Biofilm production at different chitosan concentrations:** *L. reuteri* was treated with various concentrations of chitosan (0 to 0.8 mg/ml) for up to 72 h. And the production of the efficiency of biofilm by the cells was determined, as mentioned before. Orange, Green, and blue represents 24, 48, and 72 h biofilm production.

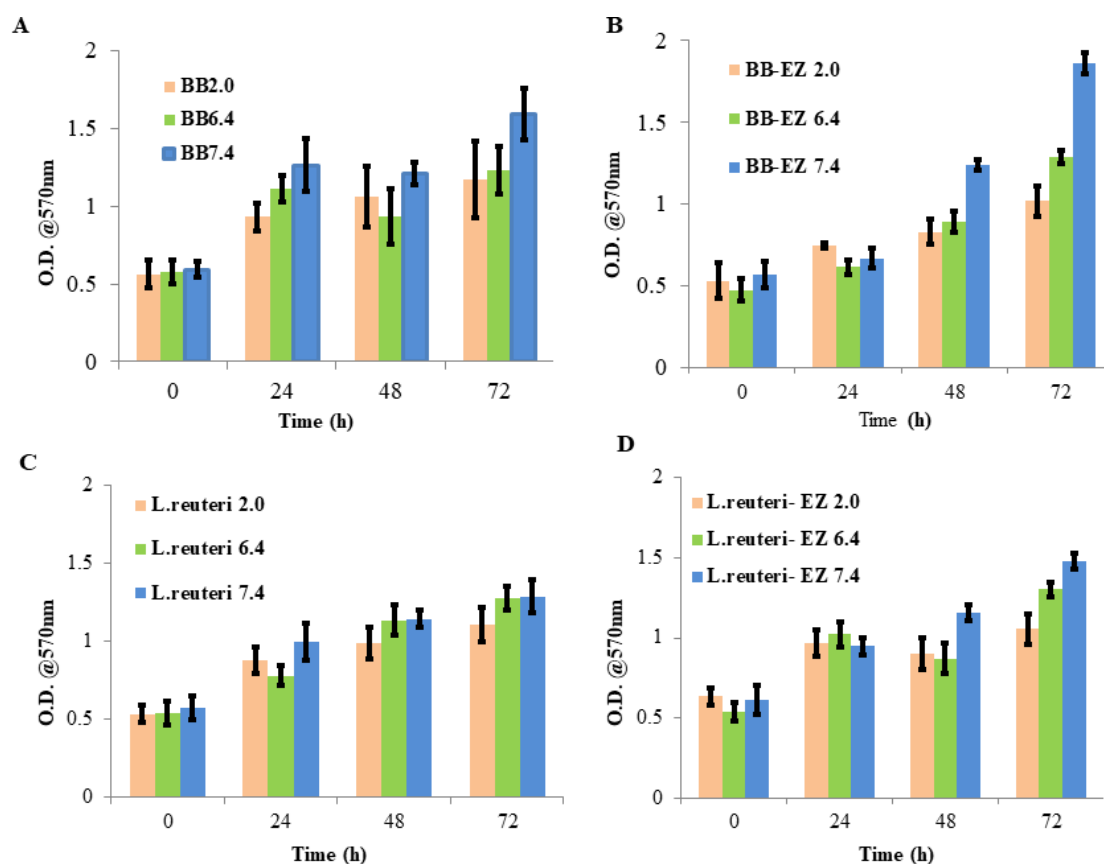

**fig. S-3 Bio-film production at different pH for *L. reuteri* and BB** (A) Biofilm production by BB in SGF and SIF without enzyme at pH 2.0, 6.4, 7.4 (B) Biofilm production by BB in SGF and SIF with the enzyme at pH 2.0, 6.4, 7.4 (C) Biofilm production by *L. reuteri* in SGF and SIF without enzyme at pH 2.0, 6.4, 7.4 (D) Biofilm production by *L. reuteri* in SGF and SIF with Enzyme at pH 2.0, 6.4, 7.4. Biofilm production was observed to be increasing with time in all the samples with and without enzymes.

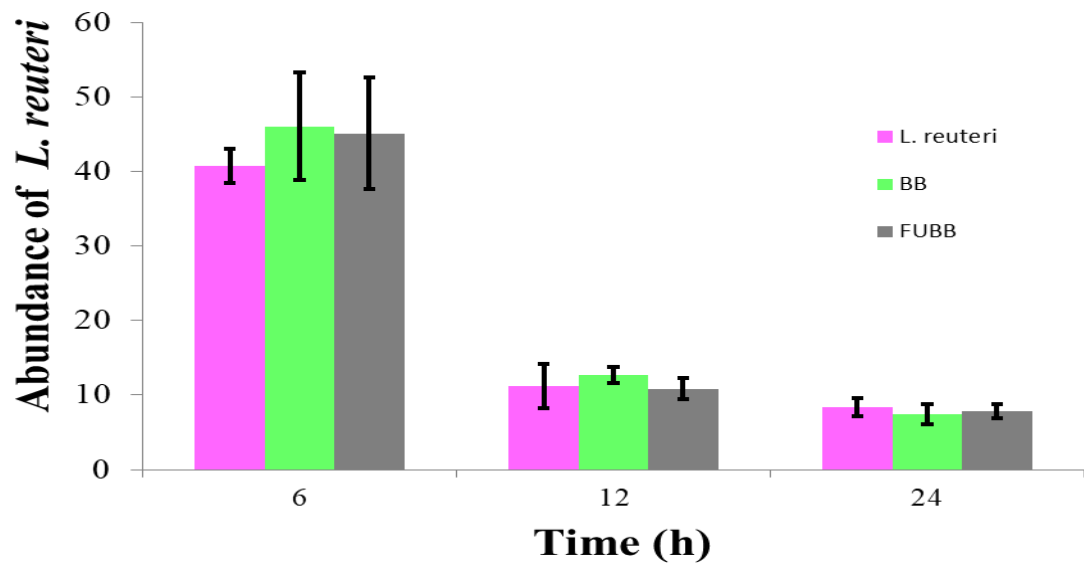

fig. S-4 Comparative expression of 16S rDNA of *L. reuteri* in the mice Feces of all three groups of mice at different time points (6h, 12h and 24 h) was collected to compare the 16S rDNA of *L. reuteri*.

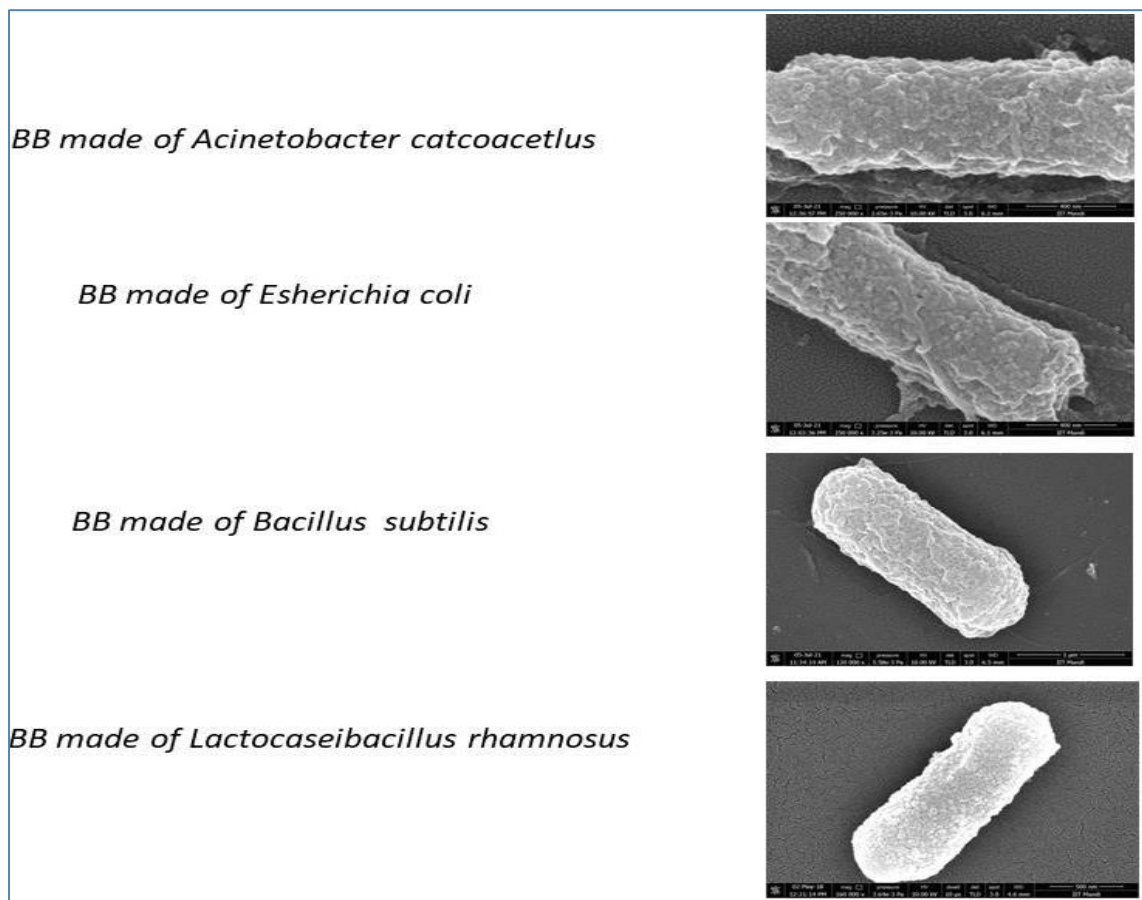

fig. S-5 Bacteriobioat formation with the different bacteria (*A. catcoacetlus*, *E. coli*, *B. subtilis*, and *L. rhamnosus*)

**TS-1 Comparison of the growth curve by comparing the area ratio of *L. reuteri* with EBB and FUBB.**

| Time (h) | O.D. @600nm<br><i>L. reuteri</i> | O.D. @600nm<br>EBB | O.D. @ 600nm<br>FUBB | Area ratio EBB<br>with <i>L. reuteri</i> | Area ratio FUBB<br>with <i>L. reuteri</i> |
|----------|----------------------------------|--------------------|----------------------|------------------------------------------|-------------------------------------------|
| 0        | 3.168027                         | 3.202721           | 3.282993             | -0.03629                                 | -3.62895                                  |
| 3        | 3.390476                         | 3.390476           | 3.327211             | 0.01866                                  | 1.865971                                  |
| 6        | 3.460544                         | 3.421769           | 3.434694             | 0.00747                                  | 0.747002                                  |
| 9        | 3.47619                          | 3.506122           | 3.570748             | -0.0272                                  | -2.72016                                  |
| 12       | 3.52517                          | 3.637415           | 3.50068              | 0.006947                                 | 0.694712                                  |
| 18       | 3.887075                         | 3.595238           | 3.364626             | 0.134407                                 | 13.44067                                  |
| 24       | 4.253061                         | 3.687075           | 3.336735             | 0.215451                                 | 21.54511                                  |
| 36       | 4.283673                         | 3.932653           | 3.382993             | 0.210259                                 | 21.02589                                  |
| 48       | 5.641497                         | 5.144898           | 5.314286             | 0.058001                                 | 5.800072                                  |
| 72       | 5.906122                         | 5.22517            | 5.772109             | 0.022691                                 | 2.269062                                  |
| 96       | 6.211565                         | 5.67415            | 5.808163             | 0.064944                                 | 6.49436                                   |

**TS-2 Comparison of the percentage growth rate ratio of *L. reuteri* with EBB and FUBB**

| Time (h) | O.D. @ 600<br><i>L. reuteri</i> | O.D. @600<br>EBB | O.D. @600<br>FUBB | %growth rate<br><i>L. reuteri</i> /EBB | %growth rate<br><i>L. reuteri</i> /FUBB |
|----------|---------------------------------|------------------|-------------------|----------------------------------------|-----------------------------------------|
| 0        | 0.200333                        | 0.231            | 0.200667          | -15.3078                               | -0.00166                                |
| 3        | 0.217333                        | 0.213333         | 0.214667          | 1.840491                               | 0.01227                                 |
| 6        | 0.267                           | 0.229            | 0.251             | 14.23221                               | 0.059925                                |
| 9        | 0.415667                        | 0.274667         | 0.235667          | 33.92141                               | 0.433039                                |
| 12       | 0.8675                          | 0.6217           | 0.235             | 28.33429                               | 0.729107                                |
| 18       | 1.339333                        | 1.028333         | 0.470333          | 23.22051                               | 0.64883                                 |
| 24       | 1.670033                        | 1.455667         | 0.6754            | 12.83607                               | 0.595577                                |
| 36       | 1.661633                        | 1.584333         | 1.160933          | 4.652049                               | 0.30133                                 |
| 48       | 1.678959                        | 1.690933         | 1.558547          | -0.71321                               | 0.071718                                |
| 72       | 1.696284                        | 1.724633         | 1.649627          | -1.67124                               | 0.027505                                |
| 96       | 1.701667                        | 1.724667         | 1.659767          | -1.35162                               | 0.024623                                |

**TS-3 Tukey's Multiple Comparison Test for the significance of the Biofilm production at pH 2.0, 6.4, 7.4. within EBB without Enzyme**

| Tukey's multiple comparisons test<br>EBB @570 | Mean Diff. | 95.00% CI of diff.  | Significant | Summary | Adjusted P-Value |
|-----------------------------------------------|------------|---------------------|-------------|---------|------------------|
| Row 1                                         |            |                     |             |         |                  |
| EBB2.0 vs. EBB6.4                             | -0.0134    | -0.3034 to 0.2766   | No          | ns      | 0.9927           |
| EBB2.0 vs. EBB7.4                             | -0.03003   | -0.3200 to 0.2600   | No          | ns      | 0.9639           |
| EBB 6.4 vs. EBB7.4                            | -0.01663   | -0.3066 to 0.2734   | No          | ns      | 0.9888           |
| Row 2                                         |            |                     |             |         |                  |
| EBB 2.0 vs. EBB6.4                            | -0.1823    | -0.4723 to 0.1077   | No          | ns      | 0.2776           |
| EBB 2.0 vs. EBB7.4                            | -0.3317    | -0.6216 to -0.04168 | Yes         | *       | 0.0228           |
| EBB 6.4 vs. EBB7.4                            | -0.1493    | -0.4393 to 0.1407   | No          | ns      | 0.4165           |
| Row 3                                         |            |                     |             |         |                  |
| EBB 2.0 vs. EBB6.4                            | 0.126      | -0.1640 to 0.4160   | No          | ns      | 0.5322           |
| EBB 2.0 vs. EBB7.4                            | -0.1482    | -0.4382 to 0.1418   | No          | ns      | 0.4218           |
| EBB 6.4 vs. EBB7.4                            | -0.2742    | -0.5642 to 0.01578  | No          | ns      | 0.0663           |
| Row 4                                         |            |                     |             |         |                  |
| EBB 2.0 vs. EBB6.4                            | -0.059     | -0.3490 to 0.2310   | No          | ns      | 0.8681           |
| EBB 2.0 vs. EBB7.4                            | -0.4197    | -0.7096 to -0.1297  | Yes         | **      | 0.0038           |
| EBB 6.4 vs. EBB7.4                            | -0.3607    | -0.6506 to -0.07068 | Yes         | *       | 0.0129           |

**TS-4 Tukey's Multiple Comparison Test for the significance of the biofilm production at pH 2.0, 6.4, 7.4. of EBB with enzyme**

| Tukey's multiple comparisons test<br>BBE 570 | Mean Diff. | 95.00% CI of diff.  | Significant | Summary | Adjusted P-Value |
|----------------------------------------------|------------|---------------------|-------------|---------|------------------|
| Row 1                                        |            |                     |             |         |                  |
| EBB-EZ 2.0 vs. EBB-EZ 6.4                    | 0.05933    | -0.07655 to 0.1952  | No          | ns      | 0.529            |
| EBB-EZ 2.0 vs. EBB-EZ 7.4                    | -0.03467   | -0.1705 to 0.1012   | No          | ns      | 0.8012           |
| EBB-EZ 6.4 vs. EBB-EZ 7.4                    | -0.094     | -0.2299 to 0.04188  | No          | ns      | 0.2157           |
| Row 2                                        |            |                     |             |         |                  |
| EBB-EZ 2.0 vs. EBB-EZ 6.4                    | 0.131      | -0.004879 to 0.2669 | No          | ns      | 0.0603           |
| EBB-EZ 2.0 vs. EBB-EZ 7.4                    | 0.077      | -0.05888 to 0.2129  | No          | ns      | 0.3492           |
| EBB-EZ 6.4 vs. EBB-EZ 7.4                    | -0.054     | -0.1899 to 0.08188  | No          | ns      | 0.5886           |
| Row 3                                        |            |                     |             |         |                  |
| EBB-EZ 2.0 vs. EBB-EZ 6.4                    | -0.0617    | -0.1976 to 0.07418  | No          | ns      | 0.5031           |
| EBB-EZ 2.0 vs. EBB-EZ 7.4                    | -0.4117    | -0.5476 to -0.2758  | Yes         | ****    | <0.0001          |
| EBB-EZ 6.4 vs. EBB-EZ 7.4                    | -0.35      | -0.4859 to -0.2141  | Yes         | ****    | <0.0001          |
| Row 4                                        |            |                     |             |         |                  |
| EBB-EZ 2.0 vs. EBB-EZ 6.4                    | -0.273     | -0.4089 to -0.1371  | Yes         | ***     | 0.0001           |
| EBB-EZ 2.0 vs. EBB-EZ 7.4                    | -0.8423    | -0.9782 to -0.7065  | Yes         | ****    | <0.0001          |
| EBB-EZ 6.4 vs. EBB-EZ 7.4                    | -0.5693    | -0.7052 to -0.4335  | Yes         | ****    | <0.0001          |

**TS-5 Tukey's Multiple Comparison Test for the significance of the Biofilm production at pH 2.0 in EBB with *L. reuteri* with and without enzyme**

| Comparison of EBB with <i>L. reuteri</i><br>Tukey's multiple comparisons test | Mean Diff. | 95.00% CI of diff. | Significant | Summary | Adjusted P-Value |
|-------------------------------------------------------------------------------|------------|--------------------|-------------|---------|------------------|
| Row 1                                                                         |            |                    |             |         |                  |
| <i>L. reuteri</i> 2.0 vs. <i>L. reuteri</i> - EZ 2.0                          | -0.0934    | -0.3651 to 0.1783  | No          | ns      | 0.7793           |
| <i>L. reuteri</i> 2.0 vs. EBB 2.0                                             | -0.05737   | -0.3290 to 0.2143  | No          | ns      | 0.9364           |
| <i>L. reuteri</i> 2.0 vs. EBB-EZ 2.0                                          | 0.1316     | -0.1400 to 0.4033  | No          | ns      | 0.5495           |
| <i>L. reuteri</i> - EZ 2.0 vs. EBB 2.0                                        | 0.03603    | -0.2356 to 0.3077  | No          | ns      | 0.9829           |
| <i>L. reuteri</i> - EZ 2.0 vs. EBB-EZ 2.0                                     | 0.225      | -0.04662 to 0.4967 | No          | ns      | 0.1297           |
| EBB 2.0 vs. EBB-EZ 2.0                                                        | 0.189      | -0.08265 to 0.4607 | No          | ns      | 0.2468           |
| Row 2                                                                         |            |                    |             |         |                  |
| <i>L. reuteri</i> 2.0 vs. <i>L. reuteri</i> - EZ 2.0                          | 0.0857     | -0.1860 to 0.3574  | No          | ns      | 0.82             |
| <i>L. reuteri</i> 2.0 vs. EBB 2.0                                             | -0.073     | -0.3447 to 0.1987  | No          | ns      | 0.8794           |
| <i>L. reuteri</i> 2.0 vs. EBB-EZ 2.0                                          | 0.164      | -0.1077 to 0.4357  | No          | ns      | 0.3631           |
| <i>L. reuteri</i> - EZ 2.0 vs. EBB 2.0                                        | -0.1587    | -0.4304 to 0.1130  | No          | ns      | 0.3913           |
| <i>L. reuteri</i> - EZ 2.0 vs. EBB-EZ 2.0                                     | 0.0783     | -0.1934 to 0.3500  | No          | ns      | 0.8559           |
| EBB 2.0 vs. EBB-EZ 2.0                                                        | 0.237      | -0.03465 to 0.5087 | No          | ns      | 0.1028           |
| Row 3                                                                         |            |                    |             |         |                  |
| <i>L. reuteri</i> 2.0 vs. <i>L. reuteri</i> - EZ 2.0                          | 0.05       | -0.2217 to 0.3217  | No          | ns      | 0.9564           |
| <i>L. reuteri</i> 2.0 vs. EBB 2.0                                             | -0.06634   | -0.3380 to 0.2053  | No          | ns      | 0.906            |
| <i>L. reuteri</i> 2.0 vs. EBB-EZ 2.0                                          | 0.08933    | -0.1823 to 0.3610  | No          | ns      | 0.8012           |
| <i>L. reuteri</i> - EZ 2.0 vs. EBB 2.0                                        | -0.1163    | -0.3880 to 0.1553  | No          | ns      | 0.644            |
| <i>L. reuteri</i> - EZ 2.0 vs. EBB-EZ 2.0                                     | 0.03933    | -0.2323 to 0.3110  | No          | ns      | 0.9779           |
| EBB 2.0 vs. EBB-EZ 2.0                                                        | 0.1557     | -0.1160 to 0.4273  | No          | ns      | 0.4079           |

**TS-6 Tukey's Multiple Comparison Test for the significance of the biofilm production at pH 6.4 in EBB with *L. reuteri* with and without enzyme**

| Tukey's multiple comparisons test                    | Mean Diff. | 95.00% CI of diff.  | Significant | Summary | Adjusted P-Value |
|------------------------------------------------------|------------|---------------------|-------------|---------|------------------|
| Row 1                                                |            |                     |             |         |                  |
| <i>L. reuteri</i> 6.4 vs. <i>L. reuteri</i> - EZ 6.4 | -0.2463    | -0.4577 to -0.03496 | Yes         | *       | 0.0181           |
| <i>L. reuteri</i> 6.4 vs. EBB 6.4                    | -0.337     | -0.5484 to -0.1256  | Yes         | **      | 0.001            |
| <i>L. reuteri</i> 6.4 vs. EBB-EZ 6.4                 | 0.1653     | -0.04604 to 0.3767  | No          | ns      | 0.164            |
| <i>L. reuteri</i> - EZ 6.4 vs. EBB 6.4               | -0.09067   | -0.3020 to 0.1207   | No          | ns      | 0.6429           |
| <i>L. reuteri</i> - EZ 6.4 vs. EBB-EZ 6.4            | 0.4117     | 0.2003 to 0.6230    | Yes         | ****    | <0.0001          |
| EBB 6.4 vs. EBB-EZ 6.4                               | 0.5023     | 0.2910 to 0.7137    | Yes         | ****    | <0.0001          |
| Row 2                                                |            |                     |             |         |                  |
| <i>L. reuteri</i> 6.4 vs. <i>L. reuteri</i> - EZ 6.4 | 0.2623     | 0.05096 to 0.4737   | Yes         | *       | 0.0111           |
| <i>L. reuteri</i> 6.4 vs. EBB 6.4                    | 0.197      | -0.01437 to 0.4084  | No          | ns      | 0.074            |
| <i>L. reuteri</i> 6.4 vs. EBB-EZ 6.4                 | 0.2463     | 0.03493 to 0.4577   | Yes         | *       | 0.0182           |
| <i>L. reuteri</i> - EZ 6.4 vs. EBB 6.4               | -0.06533   | -0.2767 to 0.1460   | No          | ns      | 0.8288           |
| <i>L. reuteri</i> - EZ 6.4 vs. EBB-EZ 6.4            | -0.01603   | -0.2274 to 0.1953   | No          | ns      | 0.9967           |
| EBB 6.4 vs. EBB-EZ 6.4                               | 0.0493     | -0.1621 to 0.2607   | No          | ns      | 0.9168           |
| Row 3                                                |            |                     |             |         |                  |
| <i>L. reuteri</i> 6.4 vs. <i>L. reuteri</i> - EZ 6.4 | -0.0283    | -0.2397 to 0.1831   | No          | ns      | 0.9824           |
| <i>L. reuteri</i> 6.4 vs. EBB 6.4                    | 0.04703    | -0.1643 to 0.2584   | No          | ns      | 0.9267           |
| <i>L. reuteri</i> 6.4 vs. EBB-EZ 6.4                 | -0.0113    | -0.2227 to 0.2001   | No          | ns      | 0.9988           |
| <i>L. reuteri</i> - EZ 6.4 vs. EBB 6.4               | 0.07533    | -0.1360 to 0.2867   | No          | ns      | 0.7602           |
| <i>L. reuteri</i> - EZ 6.4 vs. EBB-EZ 6.4            | 0.017      | -0.1944 to 0.2284   | No          | ns      | 0.996            |
| EBB 6.4 vs. EBB-EZ 6.4                               | -0.05833   | -0.2697 to 0.1530   | No          | ns      | 0.8709           |

**TS-7 Tukey's Multiple Comparison Test for the significance of the biofilm production at pH 7.4 in EBB with *L. reuteri* with and without enzyme**

| Tukey's multiple comparisons test                    | Mean Diff. | 95.00% CI of diff.  | Significant | Summary | Adjusted P-Value |
|------------------------------------------------------|------------|---------------------|-------------|---------|------------------|
| Row 1                                                |            |                     |             |         |                  |
| <i>L. reuteri</i> 7.4 vs. <i>L. reuteri</i> - EZ 7.4 | 0.0497     | -0.1607 to 0.2601   | No          | ns      | 0.9139           |
| <i>L. reuteri</i> 7.4 vs. EBB 7.4                    | -0.2656    | -0.4760 to -0.05525 | Yes         | **      | 0.0097           |
| <i>L. reuteri</i> 7.4 vs. EBB-EZ 7.4                 | 0.332      | 0.1216 to 0.5424    | Yes         | **      | 0.0012           |
| <i>L. reuteri</i> - EZ 7.4 vs. EBB 7.4               | -0.3153    | -0.5257 to -0.1049  | Yes         | **      | 0.002            |
| <i>L. reuteri</i> - EZ 7.4 vs. EBB-EZ 7.4            | 0.2823     | 0.07195 to 0.4927   | Yes         | **      | 0.0057           |
| EBB 7.4 vs. EBB-EZ 7.4                               | 0.5977     | 0.3873 to 0.8080    | Yes         | ****    | <0.0001          |
| Row 2                                                |            |                     |             |         |                  |
| <i>L. reuteri</i> 7.4 vs. <i>L. reuteri</i> - EZ 7.4 | -0.0134    | -0.2238 to 0.1970   | No          | ns      | 0.998            |
| <i>L. reuteri</i> 7.4 vs. EBB 7.4                    | -0.0669    | -0.2773 to 0.1435   | No          | ns      | 0.8165           |
| <i>L. reuteri</i> 7.4 vs. EBB-EZ 7.4                 | -0.0934    | -0.3038 to 0.1170   | No          | ns      | 0.6177           |
| <i>L. reuteri</i> - EZ 7.4 vs. EBB 7.4               | -0.0535    | -0.2639 to 0.1569   | No          | ns      | 0.8955           |
| <i>L. reuteri</i> - EZ 7.4 vs. EBB-EZ 7.4            | -0.08      | -0.2904 to 0.1304   | No          | ns      | 0.7228           |
| EBB 7.4 vs. EBB-EZ 7.4                               | -0.0265    | -0.2369 to 0.1839   | No          | ns      | 0.9852           |
| Row 3                                                |            |                     |             |         |                  |
| <i>L. reuteri</i> 7.4 vs. <i>L. reuteri</i> - EZ 7.4 | -0.1903    | -0.4007 to 0.02005  | No          | ns      | 0.0862           |
| <i>L. reuteri</i> 7.4 vs. EBB 7.4                    | -0.3033    | -0.5137 to -0.09295 | Yes         | **      | 0.0029           |
| <i>L. reuteri</i> 7.4 vs. EBB-EZ 7.4                 | -0.5703    | -0.7807 to -0.3599  | Yes         | ****    | <0.0001          |
| <i>L. reuteri</i> - EZ 7.4 vs. EBB 7.4               | -0.113     | -0.3234 to 0.09738  | No          | ns      | 0.4636           |
| <i>L. reuteri</i> - EZ 7.4 vs. EBB-EZ 7.4            | -0.38      | -0.5904 to -0.1696  | Yes         | ***     | 0.0002           |
| EBB 7.4 vs. EBB-EZ 7.4                               | -0.267     | -0.4774 to -0.05662 | Yes         | **      | 0.0093           |

**TS-8 Tukey's Multiple Comparison Test for the significance of Fluorescent Intensity Graph**

| Tukey's multiple comparisons test<br>Fluorescent Intensity Graph | Mean Diff. | 95.00% CI of diff. | Significant | Summary | Adjusted P-Value |
|------------------------------------------------------------------|------------|--------------------|-------------|---------|------------------|
| Intestine vs. <i>L. reuteri</i>                                  | 47         | -1667 to 1761      | No          | ns      | >0.9999          |
| Intestine vs. EBB                                                | 34.67      | -1679 to 1748      | No          | ns      | >0.9999          |
| Intestine vs. Rh-BB on intestine                                 | -22182     | -23896 to -20469   | Yes         | ****    | <0.0001          |
| Intestine vs. Rh on Intestine                                    | -624.7     | -2338 to 1089      | No          | ns      | 0.8651           |
| Intestine vs. <i>L. reuteri</i> -Rh on intestine                 | -60.66     | -1774 to 1653      | No          | ns      | >0.9999          |
| Intestine vs. Rh-BB                                              | -8443      | -10156 to -6729    | Yes         | ****    | <0.0001          |
| <i>L. reuteri</i> vs. EBB                                        | -12.33     | -1726 to 1701      | No          | ns      | >0.9999          |
| <i>L. reuteri</i> vs. Rh-BB on intestine                         | -22229     | -23943 to -20516   | Yes         | ****    | <0.0001          |
| <i>L. reuteri</i> vs. Rh on Intestine                            | -671.7     | -2385 to 1042      | No          | ns      | 0.8235           |
| <i>L. reuteri</i> vs. <i>L. reuteri</i> -Rh on intestine         | -107.7     | -1821 to 1606      | No          | ns      | >0.9999          |
| <i>L. reuteri</i> vs. Rh-BB                                      | -8490      | -10203 to -6776    | Yes         | ****    | <0.0001          |
| EBB vs. Rh-BB on intestine                                       | -22217     | -23931 to -20503   | Yes         | ****    | <0.0001          |
| EBB vs. Rh on Intestine                                          | -659.3     | -2373 to 1054      | No          | ns      | 0.8349           |
| EBB vs. <i>L. reuteri</i> -Rh on the intestine                   | -95.33     | -1809 to 1618      | No          | ns      | >0.9999          |
| EBB vs. Rh-BB                                                    | -8477      | -10191 to -6764    | Yes         | ****    | <0.0001          |
| Rh-BB on intestine vs. Rh on Intestine                           | 21558      | 19844 to 23271     | Yes         | ****    | <0.0001          |
| Rh-BB on intestine vs. <i>L. reuteri</i> -Rh on intestine        | 22122      | 20408 to 23835     | Yes         | ****    | <0.0001          |
| Rh-BB on intestine vs. Rh-BB                                     | 13740      | 12026 to 15453     | Yes         | ****    | <0.0001          |
| Rh on Intestine vs. <i>L. reuteri</i> -Rh on intestine           | 564        | -1150 to 2278      | No          | ns      | 0.9103           |
| Rh on Intestine vs. Rh-BB                                        | -7818      | -9532 to -6104     | Yes         | ****    | <0.0001          |
| <i>L. reuteri</i> -Rh on intestine vs. Rh-BB                     | -8382      | -10096 to -6668    | Yes         | ****    | <0.0001          |

**TS -9 Sidak's Multiple Comparison Test for the significance of the LC-ESI-MS comparison of FU-50 and FUBB-50.**

| Sidak's multiple comparisons test | Mean Diff. | 95.00% CI of diff. | Significant | Summary | Adjusted P Value |
|-----------------------------------|------------|--------------------|-------------|---------|------------------|
| FU-50 VS FUBB-50                  |            |                    |             |         |                  |
| Row 2                             | 67.33      | -1270 to 1404      | No          | ns      | >0.9999          |
| Row 3                             | 1860       | 523.2 to 3197      | Yes         | **      | 0.0027           |
| Row 4                             | -370.0     | -1707 to 966.8     | No          | ns      | 0.9805           |
| Row 5                             | -2413      | -3750 to -1076     | Yes         | ***     | 0.0001           |
| Row 6                             | -717.3     | -2054 to 619.5     | No          | ns      | 0.6281           |
| Row 7                             | -740.7     | -2078 to 596.2     | No          | ns      | 0.5918           |
| Row 8                             | -484.0     | -1821 to 852.8     | No          | ns      | 0.9207           |

**TS-10 Tukey's Multiple Comparison Test for the significance of RTV on 29th day**

| Tukey's Multiple Comparison Test RTV 29th day | Mean Diff. | q     | Significant? P < 0.05? | Summary | 95% CI of diff   |
|-----------------------------------------------|------------|-------|------------------------|---------|------------------|
| con vs EBB                                    | 1.14       | 3.447 | No                     | ns      | -0.4312 to 2.711 |
| con vs FU-25                                  | 6.53       | 19.75 | Yes                    | ***     | 4.959 to 8.101   |
| con vs FUBB-25                                | 8.48       | 25.64 | Yes                    | ***     | 6.909 to 10.05   |
| con vs FU-50                                  | 8.88       | 26.85 | Yes                    | ***     | 7.309 to 10.45   |
| con vs FUBB-50                                | 10.32      | 31.21 | Yes                    | ***     | 8.749 to 11.89   |
| EBB vs FU-25                                  | 5.39       | 16.3  | Yes                    | ***     | 3.819 to 6.961   |
| EBB vs FUBB-25                                | 7.34       | 22.19 | Yes                    | ***     | 5.769 to 8.911   |
| EBB vs FU-50                                  | 7.74       | 23.4  | Yes                    | ***     | 6.169 to 9.311   |
| EBB vs FUBB-50                                | 9.18       | 27.76 | Yes                    | ***     | 7.609 to 10.75   |
| FU-25 vs FUBB-25                              | 1.95       | 5.896 | Yes                    | *       | 0.3788 to 3.521  |



|                    |      |       |     |     |                  |
|--------------------|------|-------|-----|-----|------------------|
| FU-25 vs FU-50     | 2.35 | 7.106 | Yes | **  | 0.7788 to 3.921  |
| FU-25 vs FUBB-50   | 3.79 | 11.46 | Yes | *** | 2.219 to 5.361   |
| FUBB-25 vs FU-50   | 0.4  | 1.21  | No  | ns  | -1.171 to 1.971  |
| FUBB-25 vs FUBB-50 | 1.84 | 5.564 | Yes | *   | 0.2688 to 3.411  |
| FU-50 vs FUBB-50   | 1.44 | 4.354 | No  | ns  | -0.1312 to 3.011 |

### TS-11 Comparative changes in biochemical parameters in mice for system toxicity

| Serum component (unit)       | Control     | EBB         | FU-25       | FUBB-25    | FU-50       | FUBB-50      |
|------------------------------|-------------|-------------|-------------|------------|-------------|--------------|
| SGOT (IU/ml)                 | 25±3.1      | 26±4.0      | 32±3.6      | 28±3.4     | 38±4.1      | 33±3.8       |
| SGPT (IU/ml)                 | 30±3.8      | 31±4.3      | 37±3.2      | 33±3.6     | 43±3.5      | 38±3.7       |
| Albumin (mg/dL)              | 6.12±0.52   | 6.24±0.61   | 7.04±0.55   | 6.78±0.63  | 7.98±0.51   | 7.14±0.65    |
| Bilirubin (mg/dL)            | 0.58±0.06   | 0.6±0.07    | 0.73±0.06   | 0.65±0.06  | 0.83±0.05   | 0.75±0.04    |
| Cholesterol (mg/dL)          | 92.25±11.52 | 94.38±10.12 | 104.52±9.63 | 96.84±9.83 | 115.53±9.15 | 107.63±10.01 |
| Triglyceride (mg/dL)         | 106.8±15.3  | 105.3±13.2  | 120.6±14.3  | 109.6±15.1 | 128.6±13.3  | 121.3±14.1   |
| Globulin (mg/dL)             | 4.1±0.5     | 4.3±0.4     | 5.1±0.45    | 4.6±0.42   | 6.2±0.41    | 5.2±0.48     |
| Creatinine (mg/dL)           | 0.73±0.04   | 0.75±0.04   | 0.81±0.05   | 0.76±0.04  | 0.89±0.05   | 0.84±0.04    |
| Alkaline phosphatase (mg/dL) | 21.05±4.15  | 19.65±5.01  | 28.35±5.23  | 22.15±4.73 | 30.62±4.98  | 29.25±5.11   |

### TS-12 Tukey's Multiple Comparison Test for the significance of biochemical parameters for SGOT

| Tukey's multiple comparisons test | Mean Diff. | 95.00% CI of diff. | Significant? | Summary | Adjusted P Value |
|-----------------------------------|------------|--------------------|--------------|---------|------------------|
| SGOT                              |            |                    |              |         |                  |
| Control vs. EBB                   | -1         | -15.11 to 13.11    | No           | ns      | >0.9999          |
| Control vs. FU-25                 | -7         | -21.11 to 7.109    | No           | ns      | 0.7045           |
| Control vs. FUBB-25               | -3         | -17.11 to 11.11    | No           | ns      | 0.9897           |
| Control vs. FU-50                 | -13        | -27.11 to 1.109    | No           | ns      | 0.0893           |
| Control vs. FUBB-50               | -8         | -22.11 to 6.109    | No           | ns      | 0.5724           |
| EBB vs. FU-25                     | -6         | -20.11 to 8.109    | No           | ns      | 0.8205           |
| EBB vs. FUBB-25                   | -2         | -16.11 to 12.11    | No           | ns      | 0.9985           |
| EBB vs. FU-50                     | -12        | -26.11 to 2.109    | No           | ns      | 0.1435           |
| EBB vs. FUBB-50                   | -7         | -21.11 to 7.109    | No           | ns      | 0.7045           |
| FU-25 vs. FUBB-25                 | 4          | -10.11 to 18.11    | No           | ns      | 0.9631           |
| FU-25 vs. FU-50                   | -6         | -20.11 to 8.109    | No           | ns      | 0.8205           |
| FU-25 vs. FUBB-50                 | -1         | -15.11 to 13.11    | No           | ns      | >0.9999          |
| FUBB-25 vs. FU-50                 | -10        | -24.11 to 4.109    | No           | ns      | 0.3193           |
| FUBB-25 vs. FUBB-50               | -5         | -19.11 to 9.109    | No           | ns      | 0.9082           |
| FU-50 vs. FUBB-50                 | 5          | -9.109 to 19.11    | No           | ns      | 0.9082           |

### TS-13 Tukey's Multiple Comparison Test for the significance of biochemical parameters for SGPT

| Tukey's multiple comparisons test | Mean Diff. | 95.00% CI of diff. | Significant | Summary | Adjusted P Value |
|-----------------------------------|------------|--------------------|-------------|---------|------------------|
| SGPT                              |            |                    |             |         |                  |
| Control vs. EBB                   | -1         | -15.11 to 13.11    | No          | ns      | >0.9999          |
| Control vs. FU-25                 | -7         | -21.11 to 7.109    | No          | ns      | 0.7045           |
| Control vs. FUBB-25               | -3         | -17.11 to 11.11    | No          | ns      | 0.9897           |
| Control vs. FU-50                 | -13        | -27.11 to 1.109    | No          | ns      | 0.0893           |
| Control vs. FUBB-50               | -8         | -22.11 to 6.109    | No          | ns      | 0.5724           |
| EBB vs. FU-25                     | -6         | -20.11 to 8.109    | No          | ns      | 0.8205           |
| EBB vs. FUBB-25                   | -2         | -16.11 to 12.11    | No          | ns      | 0.9985           |
| EBB vs. FU-50                     | -12        | -26.11 to 2.109    | No          | ns      | 0.1435           |
| EBB vs. FUBB-50                   | -7         | -21.11 to 7.109    | No          | ns      | 0.7045           |
| FU-25 vs. FUBB-25                 | 4          | -10.11 to 18.11    | No          | ns      | 0.9631           |

|                     |     |                 |    |    |         |
|---------------------|-----|-----------------|----|----|---------|
| FU-25 vs. FU-50     | -6  | -20.11 to 8.109 | No | ns | 0.8205  |
| FU-25 vs. FUBB-50   | -1  | -15.11 to 13.11 | No | ns | >0.9999 |
| FUBB-25 vs. FU-50   | -10 | -24.11 to 4.109 | No | ns | 0.3193  |
| FUBB-25 vs. FUBB-50 | -5  | -19.11 to 9.109 | No | ns | 0.9082  |
| FU-50 vs. FUBB-50   | 5   | -9.109 to 19.11 | No | ns | 0.9082  |

**TS-14 Tukey's Multiple Comparison Test for the significance of biochemical parameters for Albumin**

| Tukey's multiple comparisons test | Mean Diff. | 95.00% CI of diff. | Significant | Summary | Adjusted P Value |
|-----------------------------------|------------|--------------------|-------------|---------|------------------|
| Albumin                           |            |                    |             |         |                  |
| Control vs. EBB                   | -0.22      | -14.33 to 13.89    | No          | ns      | >0.9999          |
| Control vs. FU-25                 | -0.92      | -15.03 to 13.19    | No          | ns      | >0.9999          |
| Control vs. FUBB-25               | -0.66      | -14.77 to 13.45    | No          | ns      | >0.9999          |
| Control vs. FU-50                 | -1.86      | -15.97 to 12.25    | No          | ns      | 0.9989           |
| Control vs. FUBB-50               | -1.02      | -15.13 to 13.09    | No          | ns      | >0.9999          |
| EBB vs. FU-25                     | -0.7       | -14.81 to 13.41    | No          | ns      | >0.9999          |
| EBB vs. FUBB-25                   | -0.44      | -14.55 to 13.67    | No          | ns      | >0.9999          |
| EBB vs. FU-50                     | -1.64      | -15.75 to 12.47    | No          | ns      | 0.9994           |
| EBB vs. FUBB-50                   | -0.8       | -14.91 to 13.31    | No          | ns      | >0.9999          |
| FU-25 vs. FUBB-25                 | 0.26       | -13.85 to 14.37    | No          | ns      | >0.9999          |
| FU-25 vs. FU-50                   | -0.94      | -15.05 to 13.17    | No          | ns      | >0.9999          |
| FU-25 vs. FUBB-50                 | -0.1       | -14.21 to 14.01    | No          | ns      | >0.9999          |
| FUBB-25 vs. FU-50                 | -1.2       | -15.31 to 12.91    | No          | ns      | 0.9999           |
| FUBB-25 vs. FUBB-50               | -0.36      | -14.47 to 13.75    | No          | ns      | >0.9999          |
| FU-50 vs. FUBB-50                 | 0.84       | -13.27 to 14.95    | No          | ns      | >0.9999          |

**TS-15 Tukey's Multiple Comparison Test for the significance of biochemical parameters for Alkaline phosphatase**

| Tukey's multiple comparisons test | Mean Diff. | 95.00% CI of diff. | Significant | Summary | Adjusted P Value |
|-----------------------------------|------------|--------------------|-------------|---------|------------------|
| Alkaline Phosphatase              |            |                    |             |         |                  |
| Control vs. EBB                   | 1.4        | -12.71 to 15.51    | No          | ns      | 0.9997           |
| Control vs. FU-25                 | -7.3       | -21.41 to 6.809    | No          | ns      | 0.6659           |
| Control vs. FUBB-25               | -1.1       | -15.21 to 13.01    | No          | ns      | >0.9999          |
| Control vs. FU-50                 | -9.57      | -23.68 to 4.539    | No          | ns      | 0.3688           |
| Control vs. FUBB-50               | -8.2       | -22.31 to 5.909    | No          | ns      | 0.5455           |
| EBB vs. FU-25                     | -8.7       | -22.81 to 5.409    | No          | ns      | 0.4787           |
| EBB vs. FUBB-25                   | -2.5       | -16.61 to 11.61    | No          | ns      | 0.9956           |
| EBB vs. FU-50                     | -10.97     | -25.08 to 3.139    | No          | ns      | 0.2223           |
| EBB vs. FUBB-50                   | -9.6       | -23.71 to 4.509    | No          | ns      | 0.3653           |
| FU-25 vs. FUBB-25                 | 6.2        | -7.909 to 20.31    | No          | ns      | 0.7992           |
| FU-25 vs. FU-50                   | -2.27      | -16.38 to 11.84    | No          | ns      | 0.9972           |
| FU-25 vs. FUBB-50                 | -0.9       | -15.01 to 13.21    | No          | ns      | >0.9999          |
| FUBB-25 vs. FU-50                 | -8.47      | -22.58 to 5.639    | No          | ns      | 0.5092           |
| FUBB-25 vs. FUBB-50               | -7.1       | -21.21 to 7.009    | No          | ns      | 0.6917           |
| FU-50 vs. FUBB-50                 | 1.37       | -12.74 to 15.48    | No          | ns      | 0.9998           |

**TS-16 Tukey's Multiple Comparison Test for the significance of biochemical parameters for Bilirubin**

| Tukey's multiple comparisons test | Mean Diff. | 95.00% CI of diff. | Significant | Summary | Adjusted P Value |
|-----------------------------------|------------|--------------------|-------------|---------|------------------|
| <b>Bilirubin</b>                  |            |                    |             |         |                  |
| Control vs. EBB                   | -0.02      | -14.13 to 14.09    | No          | ns      | >0.9999          |
| Control vs. FU-25                 | -0.15      | -14.26 to 13.96    | No          | ns      | >0.9999          |
| Control vs. FUBB-25               | -0.07      | -14.18 to 14.04    | No          | ns      | >0.9999          |
| Control vs. FU-50                 | -0.25      | -14.36 to 13.86    | No          | ns      | >0.9999          |
| Control vs. FUBB-50               | -0.17      | -14.28 to 13.94    | No          | ns      | >0.9999          |
| EBB vs. FU-25                     | -0.13      | -14.24 to 13.98    | No          | ns      | >0.9999          |
| EBB vs. FUBB-25                   | -0.05      | -14.16 to 14.06    | No          | ns      | >0.9999          |
| EBB vs. FU-50                     | -0.23      | -14.34 to 13.88    | No          | ns      | >0.9999          |
| EBB vs. FUBB-50                   | -0.15      | -14.26 to 13.96    | No          | ns      | >0.9999          |
| FU-25 vs. FUBB-25                 | 0.08       | -14.03 to 14.19    | No          | ns      | >0.9999          |
| FU-25 vs. FU-50                   | -0.1       | -14.21 to 14.01    | No          | ns      | >0.9999          |
| FU-25 vs. FUBB-50                 | -0.02      | -14.13 to 14.09    | No          | ns      | >0.9999          |
| FUBB-25 vs. FU-50                 | -0.18      | -14.29 to 13.93    | No          | ns      | >0.9999          |
| FUBB-25 vs. FUBB-50               | -0.1       | -14.21 to 14.01    | No          | ns      | >0.9999          |
| FU-50 vs. FUBB-50                 | 0.08       | -14.03 to 14.19    | No          | ns      | >0.9999          |

**TS-17 Tukey's Multiple Comparison Test for the significance of biochemical parameters for Cholesterol levels**

| Tukey's multiple comparisons test | Mean Diff. | 95.00% CI of diff. | Significant | Summary | Adjusted P Value |
|-----------------------------------|------------|--------------------|-------------|---------|------------------|
| <b>Cholesterol</b>                |            |                    |             |         |                  |
| Control vs. EBB                   | -2.13      | -16.24 to 11.98    | No          | ns      | 0.9979           |
| Control vs. FU-25                 | -12.27     | -26.38 to 1.839    | No          | ns      | 0.1269           |
| Control vs. FUBB-25               | -4.59      | -18.70 to 9.519    | No          | ns      | 0.9346           |
| Control vs. FU-50                 | -23.28     | -37.39 to -9.171   | Yes         | ****    | <0.0001          |
| Control vs. FUBB-50               | -15.38     | -29.49 to -1.271   | Yes         | *       | 0.0241           |
| EBB vs. FU-25                     | -10.14     | -24.25 to 3.969    | No          | ns      | 0.304            |
| EBB vs. FUBB-25                   | -2.46      | -16.57 to 11.65    | No          | ns      | 0.9959           |
| EBB vs. FU-50                     | -21.15     | -35.26 to -7.041   | Yes         | ***     | 0.0004           |
| EBB vs. FUBB-50                   | -13.25     | -27.36 to 0.8590   | No          | ns      | 0.0787           |
| FU-25 vs. FUBB-25                 | 7.68       | -6.429 to 21.79    | No          | ns      | 0.6155           |
| FU-25 vs. FU-50                   | -11.01     | -25.12 to 3.099    | No          | ns      | 0.2188           |
| FU-25 vs. FUBB-50                 | -3.11      | -17.22 to 11.00    | No          | ns      | 0.9879           |
| FUBB-25 vs. FU-50                 | -18.69     | -32.80 to -4.581   | Yes         | **      | 0.0027           |
| FUBB-25 vs. FUBB-50               | -10.79     | -24.90 to 3.319    | No          | ns      | 0.2387           |
| FU-50 vs. FUBB-50                 | 7.9        | -6.209 to 22.01    | No          | ns      | 0.5859           |

**TS-18 Tukey's Multiple Comparison Test for the significance of biochemical parameters for Triglycerides**

| Tukey's multiple comparisons test | Mean Diff. | 95.00% CI of diff. | Significant? | Summary | Adjusted P Value |
|-----------------------------------|------------|--------------------|--------------|---------|------------------|
| <b>Triglycerides</b>              |            |                    |              |         |                  |
| Control vs. EBB                   | 1.5        | -12.61 to 15.61    | No           | ns      | 0.9996           |
| Control vs. FU-25                 | -13.8      | -27.91 to 0.3090   | No           | ns      | 0.0591           |
| Control vs. FUBB-25               | -2.8       | -16.91 to 11.31    | No           | ns      | 0.9925           |
| Control vs. FU-50                 | -21.8      | -35.91 to -7.691   | Yes          | ***     | 0.0002           |
| Control vs. FUBB-50               | -14.5      | -28.61 to -0.3910  | Yes          | *       | 0.0402           |
| EBB vs. FU-25                     | -15.3      | -29.41 to -1.191   | Yes          | *       | 0.0253           |
| EBB vs. FUBB-25                   | -4.3       | -18.41 to 9.809    | No           | ns      | 0.95             |

|                     |       |                  |     |      |         |
|---------------------|-------|------------------|-----|------|---------|
| EBB vs. FU-50       | -23.3 | -37.41 to -9.191 | Yes | **** | <0.0001 |
| EBB vs. FUBB-50     | -16   | -30.11 to -1.891 | Yes | *    | 0.0165  |
| FU-25 vs. FUBB-25   | 11    | -3.109 to 25.11  | No  | ns   | 0.2197  |
| FU-25 vs. FU-50     | -8    | -22.11 to 6.109  | No  | ns   | 0.5724  |
| FU-25 vs. FUBB-50   | -0.7  | -14.81 to 13.41  | No  | ns   | >0.9999 |
| FUBB-25 vs. FU-50   | -19   | -33.11 to -4.891 | Yes | **   | 0.0022  |
| FUBB-25 vs. FUBB-50 | -11.7 | -25.81 to 2.409  | No  | ns   | 0.1639  |
| FU-50 vs. FUBB-50   | 7.3   | -6.809 to 21.41  | No  | ns   | 0.6659  |

#### TS-19 Tukey's Multiple Comparison Test for the significance of biochemical parameters for Globulin

| Tukey's multiple comparisons test | Mean Diff. | 95.00% CI of diff. | Significant | Summary | Adjusted P Value |
|-----------------------------------|------------|--------------------|-------------|---------|------------------|
| <b>Globulin</b>                   |            |                    |             |         |                  |
| Control vs. EBB                   | -0.2       | -14.31 to 13.91    | No          | ns      | >0.9999          |
| Control vs. FU-25                 | -1         | -15.11 to 13.11    | No          | ns      | >0.9999          |
| Control vs. FUBB-25               | -0.5       | -14.61 to 13.61    | No          | ns      | >0.9999          |
| Control vs. FU-50                 | -2.1       | -16.21 to 12.01    | No          | ns      | 0.9981           |
| Control vs. FUBB-50               | -1.1       | -15.21 to 13.01    | No          | ns      | >0.9999          |
| EBB vs. FU-25                     | -0.8       | -14.91 to 13.31    | No          | ns      | >0.9999          |
| EBB vs. FUBB-25                   | -0.3       | -14.41 to 13.81    | No          | ns      | >0.9999          |
| EBB vs. FU-50                     | -1.9       | -16.01 to 12.21    | No          | ns      | 0.9988           |
| EBB vs. FUBB-50                   | -0.9       | -15.01 to 13.21    | No          | ns      | >0.9999          |
| FU-25 vs. FUBB-25                 | 0.5        | -13.61 to 14.61    | No          | ns      | >0.9999          |
| FU-25 vs. FU-50                   | -1.1       | -15.21 to 13.01    | No          | ns      | >0.9999          |
| FU-25 vs. FUBB-50                 | -0.1       | -14.21 to 14.01    | No          | ns      | >0.9999          |
| FUBB-25 vs. FU-50                 | -1.6       | -15.71 to 12.51    | No          | ns      | 0.9995           |
| FUBB-25 vs. FUBB-50               | -0.6       | -14.71 to 13.51    | No          | ns      | >0.9999          |
| FU-50 vs. FUBB-50                 | 1          | -13.11 to 15.11    | No          | ns      | >0.9999          |

#### TS -20 Tukey's Multiple Comparison Test for the significance of biochemical parameters for Creatinine

| Tukey's multiple comparisons test | Mean Diff. | 95.00% CI of diff. | Significant? | Summary | Adjusted P Value |
|-----------------------------------|------------|--------------------|--------------|---------|------------------|
| <b>Creatinine</b>                 |            |                    |              |         |                  |
| Control vs. EBB                   | -0.02      | -14.13 to 14.09    | No           | ns      | >0.9999          |
| Control vs. FU-25                 | -0.08      | -14.19 to 14.03    | No           | ns      | >0.9999          |
| Control vs. FUBB-25               | -0.03      | -14.14 to 14.08    | No           | ns      | >0.9999          |
| Control vs. FU-50                 | -0.16      | -14.27 to 13.95    | No           | ns      | >0.9999          |
| Control vs. FUBB-50               | -0.11      | -14.22 to 14.00    | No           | ns      | >0.9999          |
| EBB vs. FU-25                     | -0.06      | -14.17 to 14.05    | No           | ns      | >0.9999          |
| EBB vs. FUBB-25                   | -0.01      | -14.12 to 14.10    | No           | ns      | >0.9999          |
| EBB vs. FU-50                     | -0.14      | -14.25 to 13.97    | No           | ns      | >0.9999          |
| EBB vs. FUBB-50                   | -0.09      | -14.20 to 14.02    | No           | ns      | >0.9999          |
| FU-25 vs. FUBB-25                 | 0.05       | -14.06 to 14.16    | No           | ns      | >0.9999          |
| FU-25 vs. FU-50                   | -0.08      | -14.19 to 14.03    | No           | ns      | >0.9999          |
| FU-25 vs. FUBB-50                 | -0.03      | -14.14 to 14.08    | No           | ns      | >0.9999          |
| FUBB-25 vs. FU-50                 | -0.13      | -14.24 to 13.98    | No           | ns      | >0.9999          |
| FUBB-25 vs. FUBB-50               | -0.08      | -14.19 to 14.03    | No           | ns      | >0.9999          |
| FU-50 vs. FUBB-50                 | 0.05       | -14.06 to 14.16    | No           | ns      | >0.9999          |

**TS-21 Tukey's Multiple Comparison Test for the significance of biochemical parameters for liver weight**

| Tukey's multiple comparisons test | Mean Diff. | 95.00% CI of diff. | Significant | Summary | Adjusted P Value |
|-----------------------------------|------------|--------------------|-------------|---------|------------------|
| <b>Liver weight</b>               |            |                    |             |         |                  |
| Control vs. EBB                   | -0.1       | -14.21 to 14.01    | No          | ns      | >0.9999          |
| Control vs. FU-25                 | -0.8       | -14.91 to 13.31    | No          | ns      | >0.9999          |
| Control vs. FUBB-25               | -0.2       | -14.31 to 13.91    | No          | ns      | >0.9999          |
| Control vs. FU-50                 | -1.3       | -15.41 to 12.81    | No          | ns      | 0.9998           |
| Control vs. FUBB-50               | -0.9       | -15.01 to 13.21    | No          | ns      | >0.9999          |
| EBB vs. FU-25                     | -0.7       | -14.81 to 13.41    | No          | ns      | >0.9999          |
| EBB vs. FUBB-25                   | -0.1       | -14.21 to 14.01    | No          | ns      | >0.9999          |
| EBB vs. FU-50                     | -1.2       | -15.31 to 12.91    | No          | ns      | 0.9999           |
| EBB vs. FUBB-50                   | -0.8       | -14.91 to 13.31    | No          | ns      | >0.9999          |
| FU-25 vs. FUBB-25                 | 0.6        | -13.51 to 14.71    | No          | ns      | >0.9999          |
| FU-25 vs. FU-50                   | -0.5       | -14.61 to 13.61    | No          | ns      | >0.9999          |
| FU-25 vs. FUBB-50                 | -0.1       | -14.21 to 14.01    | No          | ns      | >0.9999          |
| FUBB-25 vs. FU-50                 | -1.1       | -15.21 to 13.01    | No          | ns      | >0.9999          |
| FUBB-25 vs. FUBB-50               | -0.7       | -14.81 to 13.41    | No          | ns      | >0.9999          |
| FU-50 vs. FUBB-50                 | 0.4        | -13.71 to 14.51    | No          | ns      | >0.9999          |

**TS- 22 Dunnett's Multiple Comparison Test for the significance Biofilm with different chitosan concentrations**

| Dunnett's multiple comparisons test | Mean Diff. | 95.00% CI of diff.  | Significant | Summary | Adjusted P Value |
|-------------------------------------|------------|---------------------|-------------|---------|------------------|
| <b>24 hrs</b>                       |            |                     |             |         |                  |
| <b>0.0 vs. 0.02</b>                 | -0.111     | -0.2243 to 0.002369 | No          | ns      | 0.0571           |
| <b>0.0 vs. 0.04</b>                 | -0.232     | -0.3453 to -0.1186  | Yes         | ****    | <0.0001          |
| <b>0.0 vs.0.05</b>                  | -0.5191    | -0.6325 to -0.4058  | Yes         | ****    | <0.0001          |
| <b>0.0 vs. 0.06</b>                 | -0.5001    | -0.6135 to -0.3868  | Yes         | ****    | <0.0001          |
| <b>0.0 vs. 0.08</b>                 | -0.4697    | -0.5830 to -0.3563  | Yes         | ****    | <0.0001          |
| <b>48 hrs</b>                       |            |                     |             |         |                  |
| <b>0.0 vs. 0.02</b>                 | -0.1363    | -0.2496 to -0.02295 | Yes         | *       | 0.0123           |
| <b>0.0 vs. 0.04</b>                 | -0.6739    | -0.7873 to -0.5606  | Yes         | ****    | <0.0001          |
| <b>0.0 vs.0.05</b>                  | -0.5818    | -0.6951 to -0.4685  | Yes         | ****    | <0.0001          |
| <b>0.0 vs. 0.06</b>                 | -0.6003    | -0.7136 to -0.4869  | Yes         | ****    | <0.0001          |
| <b>0.0 vs. 0.08</b>                 | -0.641     | -0.7543 to -0.5276  | Yes         | ****    | <0.0001          |
| <b>72 hrs</b>                       |            |                     |             |         |                  |
| <b>0.0 vs. 0.02</b>                 | -0.02293   | -0.1363 to 0.09041  | No          | ns      | 0.9801           |
| <b>0.0 vs. 0.04</b>                 | -0.5167    | -0.6300 to -0.4033  | Yes         | ****    | <0.0001          |
| <b>0.0 vs.0.05</b>                  | -0.6272    | -0.7406 to -0.5139  | Yes         | ****    | <0.0001          |
| <b>0.0 vs. 0.06</b>                 | -0.4497    | -0.5630 to -0.3364  | Yes         | ****    | <0.0001          |
| <b>0.0 vs. 0.08</b>                 | -0.4654    | -0.5787 to -0.3520  | Yes         | ****    | <0.0001          |
